*Exploring the effects of CO<sub>2</sub> elevation on seedlings' growth of Acacia senegal in the era of changes*

Abdelmoniem A. Attaelmanan<sup>1&2,</sup>, Ahmed A. H. Siddig<sup>1&3,4</sup> and Essam I. Warrag<sup>1</sup>,

<sup>1</sup>University of Khartoum, Faculty of Forestry, Khartoum North postal code 13314, Sudan

<sup>2</sup>Ministry of Social Development

<sup>3</sup>Dept. Environmental Conservation – University of Massachusetts Amherst, USA <sup>4</sup>Africa

Relation Center, <sup>4</sup>Northwest Agriculture & Forestry University, Africa relation Centre, China

**\*Corresponding author:** Abdoelmoniem A. Attaelmanan

[attaelmnan@yahoo.com](mailto:attaelmnan@yahoo.com)

Phone (cell): +24 91 2 25 56300

## Abstract:

*Acacia senegal* is a priority and important C<sub>3</sub> tree species in drylands of Sudan and across the gum belt. Investigation of its seedlings response to elevated carbon dioxide (eCO<sub>2</sub>) is important as atmospheric ([CO<sub>2</sub>]) has increased and predicted to continue to rise. Many studies showed that eCO<sub>2</sub> causes increased photosynthesis in plants, which leads to greater production of carbohydrates and biomass, and increased soil organic matter and carbon content. This study investigated the effects of eCO<sub>2</sub> on *A. senegal* seedlings grown in sand and silt soils under irrigation intervals of every day and every two days. Seven days old seedlings were assigned to the treatments in Split - split plot design for 4 weeks. The main plot is eCO<sub>2</sub> (600-800 ppm) and ambient ( $\leq 400$  ppm) under Free Air CO<sub>2</sub> Enrichment (FACE) system. Subplots are irrigation intervals and soil types. Seedling height and number of leaves were measured weekly, and seedlings were harvested after 4 weeks where growth parameters and soil properties were measured. The eCO<sub>2</sub> showed no effect on the measured parameters except the significant increase in tap-root length. However, the irrigation every day showed significant increase than every two days in seedling's height, number of leaves, root length and seedling's dry weight but not seedling's and soil C% & N%. Soil treatment showed effects on stem height, leaf number, seedling's dry weight, leaves and root N% and soil C% but not root length, seedling C% and soil N%. The results indicate the importance of soil moisture, physical and chemical properties that reflects adaptation of the species to its dry land environment.

## Keywords:

*Acacia senegal*; climate change; drylands; elevated CO<sub>2</sub>; Savanna; Sudan

## 1. INTRODUCTION

Atmospheric carbon dioxide (CO<sub>2</sub>) emission and concentration has risen since the start of the industrial revolution [1] and continued to rise [2-4]. Trees and plants may respond to rising CO<sub>2</sub> as elevated atmospheric (eCO<sub>2</sub>) acts to increase photosynthetic activity [5], plant growth and plant biomass production of many plant species [6,7]. Drylands vegetation include C<sub>3</sub> and C<sub>4</sub> trees, shrubs and grasses [8]. In some of eCO<sub>2</sub> experiments, C<sub>4</sub> plants showed little or no enhancement of growth (dry matter production) in contrast, C<sub>3</sub> species showed 3 times of that experienced by C<sub>4</sub> plants in stimulation of photosynthesis by eCO<sub>2</sub> [9].

The acacias are important C<sub>3</sub> dryland species [10]. *A. senegal* is a multi-purpose tree producing gum Arabic a high-value export commodity from Sudan and some African countries, and important component of traditional dryland agroforestry resilience system and source of livelihoods in the Sudan [11]. The tree also provides animal fodder, multiple timber products, intercropping, firewood, food and medicines [12,13]. Furthermore, it is one of the most important sub-Saharan African trees inhabiting Savanna systems that are under threat of ongoing anthropogenic and climate-mediated degradation and that have led to substantial losses of natural habitats [14].

Seedlings are most responsive to eCO<sub>2</sub> where the early growth enhancement under eCO<sub>2</sub> accelerates ontogeny and pattern of growth [15,16]. The effect of eCO<sub>2</sub> on acacias as important components of the dryland natural plant communities' needs to be studied. Soil types and soil moisture content are important determinants to *A. senegal* response [17]. The methodological and experimental developments such as the Free-Air Carbon Enrichment (FACE) are effective

way to quantify the effects of eCO<sub>2</sub> on trees in field settings [18,19]. The FACE designs provide means for studies without any direct perturbation of microclimate [20]. Therefore, the objective of the paper is to experimentally examine the responses of *A. senegal* seedlings to eCO<sub>2</sub> under varying water and soil conditions using the FACE design.

## 2. MATERIALS AND METHODS

### 2.1. Study site & settings:

The experiment was conducted in the nursery as Split-split plot design with the CO<sub>2</sub> treatments as main plots, and the water interval and soil types as subplots. The nursery of the Faculty of Forestry, University of Khartoum at Shambat, Khartoum North-Sudan (15° 40' 5" North, 32 32' 1" East). Shambat has a subtropical desert / low-latitude arid hot climate. The experiment was conducted using FACE system for eCO<sub>2</sub> in the range of 600 to 800 and ambient treatments. The watering intervals were every day and every two days, while the soil treatments are sand and silt. Bulk seeds collected from El-Damazeen forests was obtained from the National Tree Seed Center and germinated in polymer bags of 10×20cm filled with silt or sand soils) and irrigated daily. After one week 60 seedlings per soil type were selected with minimum morphological variation (i.e. almost same size & branching pattern) among them. They were then assigned randomly in the experimental plots. The plot was divided into 4 subplots of five seedlings. Sixty seedlings of equal size from each soil type were assigned randomly to irrigation treatments. Three pairs of 1m×2m plots were prepared and each one assigned randomly for the eCO<sub>2</sub> and the other for the ambient CO<sub>2</sub> treatments. Then each plot was divided into two parts of 1×1m, and assigned randomly for the irrigation treatments every day and every two days. Then 5 seedlings

from those raised in silt soil and 5 ones from sandy soil were assigned randomly to each of the watering treatments (total of 120 seedlings, 60 silt and 60 sand).

## **2.2. Measured variables:**

Seedlings' height was measured and new leaves were counted weekly. After four weeks the plants were harvested, length of the tap root was measured and dry weight of the leaves, stems and roots was weighed for each plant separately. Seedling's C% and N% were determined using CHNS-O Analyzer and applying Standard Test Method (ASTM International, model D 5291-02. 2002, USA) for instrumental determination of carbon and nitrogen of plant.

Soil C% measurement is based on the oxidation of organic C with dichromate in acid medium [21] and soil N% was measured by using Bremner's method [22].

## **2.3. Data analysis:**

The Analysis of Variance (ANOVA) procedures and Duncan's Multiple Range Test to separate means of the same factor at significance were carried out using SAS. The model is Split-split plot with three blocks, CO<sub>2</sub> (main plot), watering interval and soil type within the watering interval. The model used in the experiment was:

$Y$  (dependent variable) =  $B$  (block effect) +  $C$  (CO<sub>2</sub> concentration) +  $B \times C$  +  $W$  (irrigation interval) +  $B \times C \times W$  +  $S$  (soil type) +  $C \times S$  +  $W \times S$  +  $C \times W \times S$ .

### 3. RESULTS

#### *3.1. Effects of eCO<sub>2</sub> concentration on seedlings' growth parameters:*

The eCO<sub>2</sub> concentration had no effect on seedling's height, number of leaves per seedling after 1 week, 2 weeks, 3 weeks and 4 weeks from the start of the experiment. In addition to leaves, stem, root, total dry weight, C% and N% were not affected (Table 1). Similarly, eCO<sub>2</sub> had not significantly affected soil media C%, N% and C/N. While tap root length was significantly affected by CO<sub>2</sub> elevation (P=0.002) as eCO<sub>2</sub> had decreased tap root length by 16% (P≤ 0.05; Table 1).

#### *3.2. Effects of irrigation interval on seedlings' growth parameters:*

Irrigation interval had significant effect on seedling's height, leaf number and tap root length at the end of the first, second, third and fourth week (p≤ 0.050 -< 0.0001; Table 2). Irrigation every day had resulted in increase in seedling's height by 42%, 36%, 37% and 46% by the end of first, second, third and fourth weeks, respectively. Also, It increased number of leaves per seedling at the end of each week (45, 40, 37 and 61% respectively). Similarly irrigation every day had increased tap root length by 24% at the end of fourth week (p≤ 0.05; Table 2).

Irrigation interval had affected leaves, stem, root and seedling weights (P ≤ 0.035-0.0001). Irrigation every day, as compared to irrigation every two days, had increased weight of leaves by 43%, stem by 15%, root by 21% and seedling by 15% (p≤ 0.05; Table 2).

Irrigation interval had not affected seedling's C%, N% and its compartments, soil C%, N% and soil C/N. Except root N% was affected (P=0.040) as irrigation every day had decreased root N by 6%. However, the daily irrigation was numerically lower C/N than two days irrigation but not significant (p≤ 0.05; Table 2).

### 3.3. *Effects of soil type on seedlings' growth parameters:*

Soil type showed significant effects on seedling's height (first, third and fourth week) and leaf number (second, third and fourth week) but not length of tap root ( $P=0.027-0.0001$ ; Table 3).

The silt soil had increased seedling's height by 66% for the first week, by 29% for the third and by 31% for the fourth week. Also, silt soil had enhanced leaf number by 22% for the second, by 26% for the third and by 33% for the fourth week ( $P \leq 0.05$ ; Table 3). Silt soil gave longer root (9%) but not significant.

Soil type had significant effects of leaves' dry weight ( $P < 0.0001$ ), stem ( $P=0.016$ ) and seedling ( $P=0.0019$ ) but it had slightly insignificant effects on root's dry weight ( $P=0.061$ ). Consequently, silt soil had higher dry weights in leaves by 30%, stem by 15% and seedling by 24% ( $P \leq 0.05$ ; Table 3).

Soil type had no effects on seedling's, leaves', stem's and root's C and N content. Similarly, soil N% and C/N were not affected by soil type, but soil C% was affected by soil type ( $P=0.003$ ). However, the N% and C/N of silt were numerically higher than sand soil.

## 4. DISCUSSION

### 4.1. *Effects of eCO<sub>2</sub> concentration on growth parameters:*

The insignificance of eCO<sub>2</sub> on growth parameters (height, leaf number, root length, seedling dry weight and seedling C%, N%) is in line with many other literatures [23-25]. On the other hand, eCO<sub>2</sub> is known to increase plant growth productivity and consequently has stimulated overall forests biomass growth [26-29]. Such discrepancy might be due to differences in genetic characteristics of the studied species, duration of studies, CO<sub>2</sub> elevation (exposure) techniques, and sites microclimates. Our results can be explained as, less photosynthetic machinery that

made by N deficiency or other nutrients causing lower rates of photosynthesis resulted in no increasing in net primary productivity (NPP).

#### **4.2. Effects of $eCO_2$ concentration on soil carbon and nitrogen content:**

The irresponsive of soil C%, N% and C/N to  $eCO_2$  is in agreement with various studies [30,31]. On the other hand, the results contrast the findings of [32,33]. The difference of these results can be attributed to the adverse response through down regulation of photosynthesis when plants exposed to higher  $CO_2$  concentrations beyond the certain thresholds, or the rapid rate of  $CO_2$  assimilation requires correspondingly other nutrients specially foliar N which is experienced to be declined under elevation  $CO_2$ .

#### **5. CONCLUSION:**

The irresponsive of most measured variables of *A. senegal* to  $eCO_2$  concentration and the high significant effects of water and soil factors can be attributed to the long time adaptation of the species in drylands of Sudan to water and to some extent soil type. Generally, the growth parameters of the *A. senegal* seedlings were more responsive to the environmentally limiting factors in its natural habitat, such as soil moisture content and soil chemical and physical properties.

Nevertheless, our study was limited in a number of aspects including sample size, duration & design of the experiment. Further studies on incorporating some or all of these factors will give a better picture about responses of *acacias* to  $eCO_2$  in dryland settings.

According to the results and general trends of this study, it is recommended that:

1- Water availability is the most important factor of  $eCO_2$  for seedling growth and hence water harvesting and management will play a key role in the context of elevation of  $CO_2$ .



3- In drylands where it characterized by low level of precipitation, planting seedling in silt soil is recommended for greatest growth and productivity.

4- More long-term experiments on *A. senegal* are recommended to evaluate the effects of eCO<sub>2</sub> for long term periods as some measured variables seems to be affected by time (e.g. biomass).

5- Other interacted factors with CO<sub>2</sub> like thermal stress and nutrient limitation should be investigated for better understanding of *Acacias*' response to CO<sub>2</sub>.

6- The responses of the most important C<sub>3</sub> tree species in drylands Sudan like *Acacia nilotica*, *Acacia seyal*, ..etc to CO<sub>2</sub> elevation need to be evaluated for long and short terms.

7- FACE systems (are being constructed in the USA, and now widely used in other places in the world) can be used sufficiently to study effects of CO<sub>2</sub> elevation on other trees and crops under natural conditions in Africa.

8- With regard to the net photosynthesis and stomatal responses it would be advantageous to monitor them under CO<sub>2</sub> elevation to understand up-regulation or down-regulation of photosynthesis and to show *A. senegal* stomatal response to eCO<sub>2</sub> and under what conditions this occurs. The responses of stomatal conductance and canopy leaf area to eCO<sub>2</sub> are important specially in drylands to determine both the short and long-term risk of exposure to drought.

## ACKNOWLEDGEMENTS

This work was supported by Faculty of Forestry, University of Khartoum. I gratefully acknowledge the generous support provided by Dr. Abdelazim Yaseen and Prof. Abdalla Mirghani El Tayeb for their assistance and encouragement. Special thanks and appreciation are due to Carbon Dioxide Company for their funding and sincere thanks are extended to Mr.

Waleed Elshikh, Dr. Waleed Salih, Tawfeg Eltyb Zain, Mawia and Mohammed Nasr for their help and facilitation.

## LITERATURE CITED

- 1. Munoz, C., Paulino, L., Monreal, C. and Zagal, E. 2010.** Greenhouse Gas (CO<sub>2</sub> and N<sub>2</sub>O) emissions from soil: a review. *Chil J Agric Res.* 70: 485-497.
- 2. Lindsey, R. 2018.** Climate Change: Atmospheric Carbon Dioxide. *Climate Watch Magazine.*
- 3. Le Page, M. 2019.** Carbon dioxide levels will soar past the 410 ppm milestone in 2019. Environment, The Daily Newsletter.
- 4. de la Vega, E., Chalk, T.B. and Wilson, P.A. et al. 2020.** Atmospheric CO<sub>2</sub> during the Mid-Piacenzian Warm Period and the M2 glaciation. *Sci Rep* 10, 11002. DOI: 10.1038/s41598-020-67154-8.
- 5. Albert, K. R., Ro-Poulsen, H., Mikkelsen, T. N., Michelsen, A., van der Linden, L. and Beier C. 2011.** Interactive effects of elevated CO<sub>2</sub>, warming, and drought on photosynthesis of *Deschampsia flexuosa* in a temperate heath ecosystem. *Journal of Experimental Botany* 62: 12: 4253–4266.
- 6. van der Kooi, C. J., Reich, M., Löw, M., De Kok, L. J., and Tausz, M. 2016.** Growth and yield stimulation under elevated CO<sub>2</sub> and drought: a meta-analysis on crops. *Environ. Exp. Bot.* 122: 150–157. doi: 10.1016/j.envexpbot.2015.10.004.
- 7. Cha, S., Chae H.M., Lee, S.H. and Shim, J.K. 2017.** Effect of elevated atmospheric CO<sub>2</sub> concentration on growth and leaf litter decomposition of *Quercus acutissima* and *Fraxinus rhynchophylla*. *PLoS ONE* 12(2): 0171197. <https://doi.org/10.1371/journal.pone.0171197>.

228 **8. Tielborger, K. and Salguero-Gomez, R. 2014.** Some like it hot: are desert plants indifferent  
 229 to climate change? In: Lüttge U, Beyschlag W, Cushman J (eds) *Progress in botany* . Springer,  
 230 *Berlin*75: 377–400.

231 **9. Ainsworth, E.A. and Long, S.P. 2005.** What have we learned from 15 years of free-air CO<sub>2</sub>  
 232 enrichment (FACE)? A meta-analytic review of the responses of photosynthesis, canopy  
 233 properties and plant production to rising CO<sub>2</sub>. *New Phytology* 165: 351–372.

234 **10. Sibret, Thomas. 2018.** The Sahelian Drylands Under Pressure: Studying The Impact of  
 235 Environmental Factors on Vegetation in Dahra, Senegal. Ghent University, M.Sc. dissertation.

236 **11. Raddad, E.Y. and Luukkanen, O. 2006.** Adaptive genetic variation in water-use efficiency  
 237 and gum yield in *Acacia senegal* provenances grown on clay soil in the Blue Nile region, Sudan.  
 238 *For Ecol Manag* 226: 219-229.

239 **12. Fadl, K.E.M., and Sheikh, S.E. 2010.** Effect of *Acacia senegal* on growth and yield of  
 240 groundnut, sesame and roselle in an agroforestry system in North Kordofan state, Sudan. *Agrofor*  
 241 *Syst* 78: 243–252.

242 **13. Sprent, J.I., Odee, D.W. and Dakora, F.D. 2010.** African legumes: a vital but under-  
 243 utilized resource. *J Exp Bot* 61: 1257-1265

244 **14. Hejmanova, P., Hejman, M., Camara, A.A., Antoninova, M. 2010.** Exclusion of  
 245 livestock grazing and wood collection in dryland Savanna: an effect on long-term vegetation  
 246 succession. *Afr J Ecol*. 48: 408–417.

247 **15. Norby, R.J., Wullschleger, S.D. and Gunderson, C.A. 1996.** Tree responses to elevated  
 248 CO<sub>2</sub> and implications for forests. In: Koch, G.W., Mooney, H.A., eds. Carbon Dioxide and  
 249 Terrestrial Ecosystems. San Diego, CA, USA, Academic Press: 1-21.

- 250    **16. Nguyen Cong Thinh, Etsushi Kumagai, Hiroyuki Shimono and Michio Kawasaki 2017.**  
251    Effects of elevated CO<sub>2</sub> concentration on bulbil germination and early seedling growth in  
252    Chinese yam under different air temperatures, *Plant Production Science*, 20 (3): 313-322. DOI:  
253    10.1080/1343943X.2017.1346477.
- 254    **17. Attaelmanan, A. A. 2019.** Effects of Elevated Carbon Dioxide on Growth Parameters of  
255    *Acacia senegal* Seedlings Under Nursery Conditions. PhD thesis Faculty of Forestry, University  
256    of Khartoum.
- 257    **18. Karnosky, D.F., Ceulemans, R., Scarascia-Mugnozza, G.E. and Innes, J. L. 2001.** The  
258    impact of carbon dioxide and other greenhouse gases on forest ecosystems. Wallingford: CABI:  
259    357.
- 260    **19. Paoletti ,E., Materassi, A., Fasano, G., Hoshika, Y., Carriero, G., Silaghi, D. and**  
261    **Badea, O. 2017.** A new-generation 3D ozone FACE (Free Air Controlled Exposure). *Sci Tot*  
262    *Environ* 575:1407-1414.
- 263    **20. Hendry, G. R. and Kimball, B. A. 1994.** The FACE program. *Agriculture and forest*  
264    *meteorology* 70: 3-14.
- 265    **21. Walkley, A. and Black, I.A. 1934.** An examination of the Degtjareff method for  
266    determining soil organic matter, and a proposed modification of the chromic acid titration  
267    method. *Soil Science*, 37, 29-38.
- 268    **22. Bremner, J.M. and Edwards, A.P. 1965.** Determination and isotope-ratio analysis of  
269    different forms of nitrogen in soils-I. Apparatus and procedure for distillation and determination  
270    of ammonium. *Proc. Soil Sci. Sot. Am.*, 29, 504-507.

23. Charles, R.T., Justin, D.D., Wayne, P.H. and Hyrum, B.J. 2007. Response of seedlings of two hypogeal brush species to CO<sub>2</sub> enrichment. U.S. Department of Agriculture, Forest Service, Rocky Mountain Research Station: 104-106.
24. Chae *et al.* 2016. Effects of elevated CO<sub>2</sub> on aboveground growth in seedlings of *Quercus* species. *Applied Ecology And Environmental Research* 14(3): 597-611. <http://www.aloki.hu>, DOI: 10.15666/aeer/1403-597611.
25. Li L, Wang X and Manning WJ. 2019. Effects of Elevated CO<sub>2</sub> on Leaf Senescence, Leaf Nitrogen Resorption, and Late-Season Photosynthesis in *Tilia americana* L. *Front. Plant Sci.* 10:1217. Doi: 10.3389/fpls.2019.01217.
26. Cole, C. T., J. E. Anderson, R. L. Lindroth, and D. M. Waller. 2010. Rising concentrations of atmospheric CO<sub>2</sub> have increased growth of natural stands of quaking aspen (*Populus tremuloides*). *Global Change Biology* 16:2186–2197.
27. Benlloch-Gonzalez, M. , Jens, B., Helen B., Greg, R. and Jairo, A.P. 2014. The plasticity of the growth and proliferation of wheat root system under elevated CO<sub>2</sub>. *Plant Soil* 374: 963–976. DOI 10.1007/s11104-013-1934-3.
28. Gustafson, E. J., B. R. Miranda, B. R. Sturtevant, and M. E. Kubiske. 2018. Can future CO<sub>2</sub> concentrations mitigate the negative effects of high temperature and longer droughts on forest growth? *Forests* 911:664.
29. Zheng Yunpu, Fei Li, Lihua Hao, Jingjin Yu, Lili Guo, Haoran Zhou, Chao Ma, Xixi Zhang and Ming Xu. 2019. Elevated CO<sub>2</sub> concentration induces photosynthetic down-regulation with changes in leaf structure, non-structural carbohydrates and nitrogen content of soybean. *BMC Plant Biology* 19:255. <https://doi.org/10.1186/s12870-019-1788-9>.

30. Crous, K.Y., Walters, M.B. and Ellsworth, D.S. 2008. Elevated CO<sub>2</sub> concentration affects leaf photosynthesis-nitrogen relationships in *Pinus taeda* over nine years in FACE. *Tree Physiol* 28: 607–614.
31. Hoosbeek, M.R., Lukac, M., Velthorst, E., Smith, A.R. and Godbold, D.L. 2011. Free atmospheric CO<sub>2</sub> enrichment increased above ground biomass but did not affect symbiotic N<sub>2</sub>-fixation and soil carbon dynamics in a mixed deciduous stand in Wales. *Biogeosciences* 8: 353-364, [www.biogeosciences.net/8/353/2011/](http://www.biogeosciences.net/8/353/2011/) doi:10.5194/bg-8-353-2011.
32. Langley, J.A., McKinley, D.C., Wolf, A.A., Hungate, B.A., Drake, B.G. and Megonigal, J.P. 2009. Priming depletes soil carbon and releases nitrogen in a scrub-oak ecosystem exposed to elevated CO<sub>2</sub>. *Soil Biology and Biochemistry* 41: 54 -60.
33. Suwa, M., Katul, G.G., Oren, R., Andrews, J., Pippen, J., Mace, A. and Schlesinger, W.H. 2004. Impact of elevated atmospheric CO<sub>2</sub> on forest floor respiration in a temperate pine forest. *Global Biogeochem Cycles*: 18. doi:10.129/2003GB002182.

## TABLES

**Table 1:** Effects of CO<sub>2</sub> concentration on seedling's height, number of leaves, root length, seedling's biomass weight and seedling and soil carbon & nitrogen contents after 4 weeks.

| <b>(1) Seedling growth/cm</b>         |                        |                       |                |
|---------------------------------------|------------------------|-----------------------|----------------|
|                                       | <i>eCO<sub>2</sub></i> | <i>CO<sub>2</sub></i> | <i>P value</i> |
| 1. Stem height: Week1                 | 4.52                   | 4.43                  | 0.89           |
| Week 2                                | 5.89                   | 5.25                  | 0.25           |
| Week 3                                | 13.71                  | 12.86                 | 0.16           |
| Week 4                                | 16.52                  | 15.86                 | 0.30           |
| 2. Leaf number: Week1                 | 6.65                   | 7.74                  | 0.23           |
| Week 2                                | 12.93                  | 12.32                 | 0.54           |
| Week 3                                | 19.38                  | 18.57                 | 0.59           |
| Week 4                                | 25.07                  | 23.81                 | 0.55           |
| 3. Root length                        | 9.72a                  | 11.62b                | <b>0.002</b>   |
| <b>(2) Biomass weight/g</b>           |                        |                       |                |
| 1. Leaves dry weight                  | 0.64                   | 0.66                  | 0.423          |
| 2. Stem dry weight                    | 0.45                   | 0.43                  | 0.423          |
| 3. Root dry weight                    | 9.00                   | 8.65                  | 0.607          |
| 4. Seedling dry weight                | 1.49                   | 1.35                  | 0.072          |
| <b>(3) C&amp;N contents and ratio</b> |                        |                       |                |
| 1. Seedlings C%                       | 41                     | 43                    | 0.610          |

|                 |       |       |       |
|-----------------|-------|-------|-------|
| Leaves C%       | 33.6  | 42    | 0.346 |
| Stem C%         | 44.5  | 45.9  | 0.816 |
| Root C%         | 41.79 | 39.95 | 0.696 |
| 2. Seedlings N% | 3.2   | 3.3   | 0.725 |
| Leaves N%       | 4.57  | 4.47  | 0.056 |
| Stem N%         | 2.4   | 2.3   | 0.378 |
| Root N%         | 2.0   | 2.4   | 0.101 |
| 1. Soil C%.     | 0.48  | 0.58  | 0.255 |
| 2. Soil N%      | 0.14  | 0.16  | 0.457 |
| 3. Soil C/N     | 11.0  | 11.2  | 0.962 |



370 **Table 2:** Effects of irrigation interval on seedling's height, number of leaves, root length,  
 371 seedling's biomass weight and seedling & soil carbon and nitrogen contents after 4 weeks.  
 372

| <b>(1) Seedling growth/cm</b>         |                 |                  |                   |
|---------------------------------------|-----------------|------------------|-------------------|
|                                       | <i>1d irri.</i> | <i>2 d irri.</i> | <i>P value</i>    |
| 1. Stem height: Week1                 | 5.24a           | 3.70b            | <b>0.050</b>      |
| Week 2                                | 6.42a           | 4.72b            | <b>0.011</b>      |
| Week 3                                | 15.34a          | 11.23b           | <b>&lt;0.0001</b> |
| Week 4                                | 19.20a          | 13.18b           | <b>&lt;0.0001</b> |
| 2. Leaf number: Week1                 | 8.50a           | 5.88b            | <b>0.0157</b>     |
| Week 2                                | 14.73a          | 10.52b           | <b>0.0022</b>     |
| Week 3                                | 21.92a          | 16.04b           | <b>0.0042</b>     |
| Week 4                                | 30.16a          | 18.72b           | <b>0.0005</b>     |
| 3. Root length                        | 11.83a          | 9.51b            | <b>0.0007</b>     |
| <b>(2) Biomass weight/g</b>           |                 |                  |                   |
| 1. Leaves dry weight                  | 0.77a           | 0.54b            | <b>&lt;0.0001</b> |
| 2. Stem dry weight                    | 0.47a           | 0.41b            | <b>0.029</b>      |
| 3. Root dry weight                    | 9.66a           | 7.99b            | <b>0.035</b>      |
| 4. Seedling dry weight                | 0.47a           | 0.41b            | <b>0.029</b>      |
| <b>(3) C&amp;N contents and ratio</b> |                 |                  |                   |
| 1. Seedlings C%                       | 43.2            | 41.6             | 0.466             |
| Leaves C%                             | 42              | 33               | 0.34              |

|                 |       |       |              |
|-----------------|-------|-------|--------------|
| Stem C%         | 46.4  | 44    | 0.689        |
| Root C%         | 39.13 | 42.61 | 0.466        |
| 2. Seedlings N% | 3.4   | 3.2   | 0.461        |
| Leaves N%       | 4.48  | 4.56  | 0.648        |
| Stem N%         | 2.4   | 2.4   | 0.432        |
| Root N%         | 2.0 a | 2.12b | <b>0.040</b> |
| 1. Soil C%.     | 0.56  | 0.50  | 0.483        |
| 2. Soil N%      | 0.18  | 0.12  | 0.112        |
| 3. Soil C/N     | 11.2  | 11.1  | 0.969        |

**Table 3:** Effects of soil type on seedling's height, number of leaves, root length, seedling's biomass weight and seedling & soil carbon & nitrogen contents after 4 weeks.

| <b>(1) Seedling growth/cm</b>         |             |             |                   |
|---------------------------------------|-------------|-------------|-------------------|
|                                       | <i>silt</i> | <i>sand</i> | <i>P value</i>    |
| 1. Stem height: Week1                 | 5.59a       | 3.36b       | <b>0.0113</b>     |
| Week 2                                | 5.933       | 5.217       | 0.205             |
| Week 3                                | 14.95a      | 11.62b      | <b>0.0003</b>     |
| Week 4                                | 18.35a      | 14.04b      | <b>&lt;0.0001</b> |
| 2. Leaf number: Week1                 | 7.81        | 6.57        | 0.186             |
| Week 2                                | 13.90a      | 11.35b      | <b>0.027</b>      |
| Week 3                                | 21.18a      | 16.77b      | <b>0.017</b>      |
| Week 4                                | 27.90a      | 20.99b      | <b>0.009</b>      |
| 3. Root length                        | 11.14       | 10.20       | 0.06              |
| <b>(2) Biomass weight/g</b>           |             |             |                   |
| 1. Leaves dry weight                  | 0.74a       | 0.57b       | <b>&lt;0.0001</b> |
| 2. Stem dry weight                    | 0.47a       | 0.41b       | <b>0.016</b>      |
| 3. Root dry weight                    | 9.55        | 8.10        | 0.061             |
| 4. Seedling dry weight                | 1.57a       | 1.27b       | <b>0.0019</b>     |
| <b>(3) C&amp;N contents and ratio</b> |             |             |                   |
| 1. Seedlings C%                       | 42.8        | 42          | 0.722             |
| Leaves C%                             | 42          | 33.68       | 0.346             |

|                 |       |       |               |
|-----------------|-------|-------|---------------|
| Stem C%         | 45.7  | 44.7  | 0.937         |
| Root C%         | 40.31 | 41.43 | 0.813         |
| 2. Seedlings N% | 3.4   | 3.2   | 0.505         |
| Leaves N%       | 4.72a | 4.32b | <b>0.045</b>  |
| Stem N%         | 2.5   | 2.1   | 0.444         |
| Root N%         | 2.5a  | 2.0b  | <b>0.0149</b> |
| 1. Soil C%.     | 0.69a | 0.37b | <b>0.003</b>  |
| 2. Soil N%      | 0.17  | 0.13  | 0.217         |
| 3. Soil C/N     | 13.3  | 9.0   | 0.308         |
